# Supplementary material for: Photovoltaic Device Application of a Hydroquinone-Modified Conductive Polymer and Dual-Functional Molecular Si Surface Passivation Technology
Source: MDPI journal article supplement (doi:10.3390/polym14030478), 2022-01-25
Supplement: s1 [file s1]

# Photovoltaic Device Application of a Hydroquinone-Modified Conductive Polymer and Dual-Functional Molecular Si Surface Passivation Technology

Na Yeon Park <sup>1</sup>, Gwan Seung Jeong <sup>1</sup>, Young-Jin Yu <sup>1</sup>, Yoon-Chae Jung <sup>1</sup>, Jin Hee Lee <sup>2</sup>, Jung Hwa Seo <sup>2</sup> and Jea-Young Choi <sup>3,\*</sup>

<sup>1</sup> Department of Metallurgical Engineering, Dong-A University, 37 Nakdong-Daero, 550 Beon-gil, Saha-gu, Busan 604-714, Korea; nayeon2385@gmail.com (N.Y.P.); wjdrhkstmd12@gmail.com (G.S.J.); tq6284@naver.com (Y.-J.Y.); dbSCO0306@naver.com (Y.-C.J.)

<sup>2</sup> Department of Chemical Engineering, Dong-A University, 37 Nakdong-Daero, 550 Beon-gil, Saha-gu, Busan 604-714, Korea; dljh82@gmail.com (J.H.L.); seojh@dau.ac.kr (J.H.S.)

<sup>3</sup> Department of Materials Sciences & Engineering, Dong-A University, 37 Nakdong-Daero, 550 Beon-gil, Saha-gu, Busan 604-714, Korea

\* Correspondence: cji4395@dau.ac.kr

$$J = J_0 \left( \exp \left( \frac{eV}{nkT} \right) - 1 \right) \quad (1)$$

$$J_0 = A^* A T^2 \exp \left( - \frac{V_{bi}}{kT} \right) \quad (2)$$

We measured the dark J-V curve to analyze the characteristics of the HSCs interface additionally. Diode equations such as Equations (1) and (2) can express the dark JV characteristic in log scale and extract the values of the desired characteristics. A is the contact area,  $A^*$  is the effective Richardson constant ( $120 \text{ Acm}^{-2}\text{K}^{-2}$  for *n*-type silicon),  $T$  is 298 K (25 °C),  $k$  is Boltzmann constant,  $n$  is ideality factor,  $J_0$  is the reverse saturation current density,  $V_{bi}$  is the barrier height in Schottky diodes, i.e., built-in-potential, and  $q$  is the elementary charge.

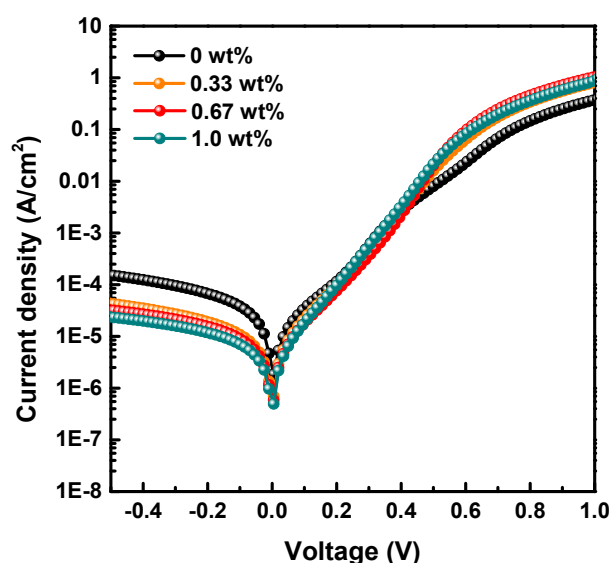

**Figure S1.** In J-V curves measured in the dark condition for fabricated *n*-Si/HQ-PEDOT:PSS HSCs with various HQ addition amounts.

**Table S1.** Summary of  $J_0$ ,  $n$ , and  $V_{bi}$  fitted parameters from the measured dark  $\ln$  J-V curves of various amounts of Si/HQ-PEDOT:PSS HSCs.

| Amount of HQ addition | $J_0$ (A/cm <sup>2</sup> ) | $n$  | $V_{bi}$ (V) |
|-----------------------|----------------------------|------|--------------|
| 0 wt%                 | $1.58 \times 10^{-5}$      | 3.39 | 0.627        |
| 0.33 wt%              | $3.69 \times 10^{-5}$      | 2.63 | 0.665        |
| 0.67 wt%              | $4.39 \times 10^{-6}$      | 2.70 | 0.661        |
| 1.0 wt%               | $3.54 \times 10^{-6}$      | 2.32 | 0.666        |

**Table S2.** Summary of  $J_0$ ,  $n$  and  $V_{bi}$  fitted parameters from the measured dark  $\ln$  J-V curves of the Si PEDOT:PSS(DMSO, HQ) HSCs.

| PEDOT:PSS | $J_0$ (A/cm <sup>2</sup> ) | $n$  | $V_{bi}$ (V) |
|-----------|----------------------------|------|--------------|
| DMSO      | $1.54 \times 10^{-5}$      | 2.82 | 0.623        |
| HQ        | $4.39 \times 10^{-6}$      | 2.70 | 0.661        |

The dark J-V curve was measured to analyze the characteristics of the BQ-HSCs interface additionally. According to the contact angle with  $\tau_{eff}$ , the leakage current value of BQ-HSC should decrease more than that of SiOx-HSC. As shown in Figure S2, the leakage current in the reverse bias is significantly smaller than SiOx-HSC, indicating a decrease in carrier recombination at the interface. The desired dark J-V characteristics values in the log scale were extracted using Equations (1) and (2)

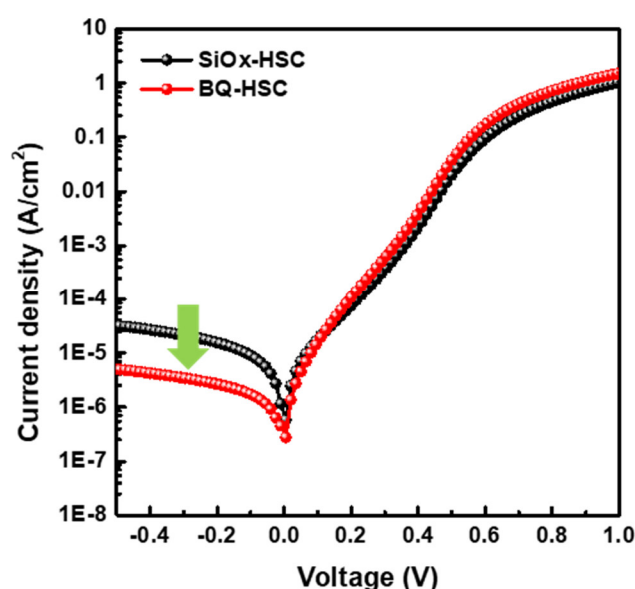**Figure S2.** Dark characteristics (a) Dark  $\ln$  J-V curves, (b)  $d(V)/d(\ln J)$  vs  $J$  plots and (c)  $H(J)$  vs  $J$  plots of the BQ-HSC and SiOx-HSC.

The  $n$  value of HSCs can be extracted from the slope of the tangent line corresponding to the log scale J-V curve in the forward voltage section of 0.1–0.2 V, and the  $n$  value of SiOx-HSC and BQ-HSC was calculated using Eq. (S1). BQ-HSC has a lower value than SiOx-HSC, representing a better junction quality because of the improved wettability due

to the BQ passivation layer between HQ-PEDOT:PSS and Si surface. Moreover,  $J_0$  is a value determined by carrier recombination in the neutral region on both sides of the junction. As mentioned above, the  $J_0$  value of HQ-HSC is smaller than that of SiO<sub>x</sub>-HSC due to the reduction in carrier recombination on the Si surface because of the chemical passivation on the Si surface and the field effect passivation by dipole formation. Equation (2) can extract  $V_{bi}$  from the  $J_0$  value. Therefore, the characteristic result of the dark JV becomes the basis for high photovoltaic efficiency due to the efficient carrier transport and collection.

**Table S3.** Summary of  $J_0$ ,  $n$ , and  $V_{bi}$ , fitted parameters from the measured dark ln J-V curves of the HSCs.

| Passivation           | $J_0(\text{A/cm}^2)$  | $n$  | $V_{bi}(\text{V})$ |
|-----------------------|-----------------------|------|--------------------|
| SiO <sub>x</sub> -HSC | $4.39 \times 10^{-6}$ | 2.70 | 0.661              |
| BQ-HSC                | $1.25 \times 10^{-6}$ | 2.03 | 0.693              |
